# Supplementary material
Source: publisher figshare collection journal article supplement (https://asha.figshare.com/ndownloader/files/38743845)
Supplement: Supplementary file 1 [file 38743845]

## Sheet: Combined participants
Supplemental Material S2, Lee et al., “The Role of Naturalistic Developmental Behavioral Interventions in Early Intervention for Autistic Toddlers: An Observational Study,” AJSLP, https://doi.org/10.1044/2022_AJSLP-22-00190
	Observed Scores on the NDBI-Fi									Self-Reported Strategies from Therapeutic Approach Survey			Observed Strategy Recommendations from Content Analysis
	Developmental Strategy Scores Mean (SD) Min-Max						Behavioral Strategy Scores Mean (SD) Min-Max			Reported Developmental Strategies	Reported Behavioral Strategies	Reported Other Strategies	Number of Developmental Strategies	Number of Behavioral Strategies	Number of Other Strategy Recommendations
Participant Number	Face-to-Face	Follow the Child's Lead	Positive Affect and Animation	Modeling Appropriate language	Responding to Child Communication	Pace of Verbal Models	Communication Temptations	Frequency of Direct Teaching	Quality of Direct Teaching
1	3	4	4	4	4	4	0	2	5	Language Expansions, Notice and respond, Follow the child's lead, Observe-Wait-Listen, Matched turns	Communication Temptations	0	3	1	6
2	5 (0) 5-5	3.13 (0.83) 2-4	5 (0) 5-5	3.88 (0.35) 3-4	4 (0) 4-4	3.25 (0.46) 3-4	3.5 (1.69) 1-5	3.38 (1.77) 1-5	3.25 (1.98) 1-5	Self-Talk, Parallel talk, Reduced Length of Utterance, Model target language, Verbal imitation	Communication Temptations, Prompting, Verbal imitation hierarchy	Sign language	0	0	0
3	3 (0.71) 2-4	2.89 (0.33) 2-3	4 (0) 4-4	3.56 (0.53) 3-4	3.44 (0.53) 3-4	3.22 (0.44) 3-4	0 (0) 0-0	0 (0) 0-0	0 (0) 0-0	Notice and respond, Follow the child's lead, Observe-Wait-Listen, Model target language, Recasting, Verbal imitation	Communication Temptations, Verbal imitation hierarchy	Sign language	0	0	0
4* (session 1)	3.56 (1.13) 1-5	3.89 (0.60) 3-5	4.23 (0.45) 4-5	4 (0) 4-4	4.56 (0.53) 4-5	4 (0) 4-4	0.89 (0.78) 0-2	0.89 (0.78) 0-2	2 (2.12) 0-5	Language Expansions, Parallel talk, Follow the child's lead, Mirroring and Mapping	Communication Temptations	0	3	0	4
4* (session 2)	3.33 (0.58) 3-4	4 (0) 4-4	4 (0) 4-4	4 (0) 4-4	4 (0) 4-4	4 (0) 4-4	0 (0) 0-0	0.67 (0.58) 0-1	1.67 (1.53) 0-3	Language Expansions, Reduced Length of Utterance, Follow the child's lead, Mirroring and Mapping, Model target language	Communication Temptations	0	6	1	4
5	3.13 (0.64) 2-4	3.5 (0.53) 3-4	4 (0) 4-4	3.63 (0.52) 3-4	4 (0) 4-4	4 (0) 4-4	0 (0) 0-0	0.25 (0.46) 0-1	1 (1.85) 0-4	Language Expansions, Self-Talk, Parallel talk, Reduced Length of Utterance, Notice and respond, Follow the child's lead, Observe-Wait-Listen, Model target language, Verbal imitation	Communication Temptations, Prompting, Sabotage	0	0	0	0
6	3.27 (0.47) 3-4	4.09 (0.54) 3-5	4 (0) 4-4	3.54 (0.52) 3-4	3.18 (0.60) 2-4	4 (0) 4-4	0.09 (0.30) 0-1	0.36 (0.50) 0-1	1.82 (2.52) 0-5	Language Expansions, Parallel talk, Reduced Length of Utterance, Follow the child's lead, Model target language, Verbal imitation	Communication Temptations, Prompting	Visual supports	0	0	0
7	2.88 (0.83) 2-4	3.5 (0.53) 3-4	5 (0) 5-5	3.63 (0.52) 3-4	3.5 (0.53) 3-4	3.5 (0.53) 3-4	0.38 (0.74) 0-2	1.38 (1.99) 0-5	2.13 (2.30) 0-5	Language Expansions, Self-Talk, Notice and respond, Follow the child's lead, Observe-Wait-Listen, Model target language, Verbal imitation	Communication Temptations, Prompting, Sabotage	Sign language	0	0	0
8	3 (0.63) 2-4	3.45 (0.52) 3-4	4 (0) 4-4	3.64 (0.50) 3-4	4 (0) 4-4	3.45 (0.52) 3-4	0.91 (1.38) 0-4	1.09 (1.22) 0-3	2.36 (2.29) 0-5	Parallel talk, Reduced Length of Utterance, Notice and respond, Follow the child's lead, Model target language, Matched turns	Prompting	Visual supports	0	0	2
9	2 (0) 2-2	4 (0) 4-4	4 (0) 4-4	3.2 (0.42)	3.9 (0.32) 3-4	3 (0.47) 2-4	0 (0) 0-0	0.4 (0.52) 0-1	1.4 (1.84) 0-4	Language Expansions, Reduced Length of Utterance, Follow the child's lead, Observe-Wait-Listen, Verbal imitation	0	Visual supports	0	0	0
10	2.36 (0.50) 2-3	3.55 (0.53) 3-4	4 (0) 4-4	3 (0) 3-3	3.82 (0.40) 3-4	3.18 (0.60) 2-4	0.45 (1.04) 0-3	1.18 (1.72) 0-5	1.36 (1.50) 0-4	Reduced Length of Utterance, Follow the child's lead, Model target language	0	Sign language, Auditory Bombardment	1	1	4
11	2.75 (0.5) 2-3	3.75 (0.5) 3-4	4 (0) 4-4	3.75 (0.5) 3-4	4 (0) 4-4	3.75 (0.5) 3-4	0.25 (0.5) 0-1	1.5 (1.73) 0-4	3 (2.16) 0-5	Language Expansions, Self-Talk, Parallel talk, Reduced Length of Utterance, Follow the child's lead, Model target language, Verbal imitation	Communication Temptations, Prompting, Sabotage, Environmental Arrangement	Sign language	0	0	0
12^	4.67(0.5) 4-5	3.67 (0.5) 3-4	4.12 (0.34) 4-5	3.22 (0.44) 3-4	4 (0) 4-4	3.67 (0.5) 3-4	0.44 (1.33) 0-4	0.78 (0.72) 0-5	0.89 (1.76) 0-4	n/a	n/a	n/a	0	0	1
13* (session 1)	4 (0) 4-4	3.8 (0.45) 4-4	5 (0) 5-5	3.4 (0.55) 3-4	4.2 (0.45) 4-5	4 (0) 4-4	0.4 (0.89) 0-2	1.8 (2.17) 0-5	2.6 (2.40) 0-5	Language Expansions, Self-Talk, Parallel talk, Notice and respond, Follow the child's lead, Mirroring and Mapping, Observe-Wait-Listen, Model target language, Recasting, Verbal imitation, Matched turns	Communication Temptations, Prompting, Sabotage, Verbal imitation hierarchy, Environmental Arrangement	Sign language, Word Affect Action, Build up Break down, Auditory Bombardment	4	1	4
13* (session 2)	4 (0.89) 3-5	3.84 (0.41) 3-4	4 (0) 4-4	4 (0) 4-4	4 (0) 4-4	4 (0) 4-4	1.33 (1.97) 0-5	3.83 (1.60) 1-5	3.83 (0.41) 3-4	Language Expansions, Self-Talk, Parallel talk, Reduced Length of Utterance, Follow the child's lead, Mirroring and Mapping, Observe-Wait-Listen, Model target language, Verbal imitation	Communication Temptations, Prompting, Sabotage, Verbal imitation hierarchy, Environmental Arrangement	Sign language, Word Affect Action, Auditory Bombardment, Functional Communication Training, Visual supports	1	2	6
14	3 (1.41) 2-4	4 (0) 4-4	4 (0) 4-4	4 (0) 4-4	4 (0) 4-4	4 (0) 4-4	0 (0) 0-0	0 (0) 0-0	0 (0) 0-0	Follow the child's lead, Model target language	Communication Temptations, Sabotage, Verbal imitation hierarchy	0	3	1	1
15	3.67 (0.5) 3-4	3.78 (0.45) 3-4	3.89 (0.34) 3-4	3.56 (0.53) 3-4	4 (0) 4-4	3.33 (0.5) 3-4	0.33 (0.5) 0-1	0.67 (1) 0-3	1.67 (2.06) 0-5	Language Expansions, Self-Talk, Parallel talk, Notice and respond, Follow the child's lead, Model target language, Verbal imitation	Prompting, Sabotage, Verbal imitation hierarchy	Sign language, Auditory Bombardment, Functional Communication Training	0	1	1
16* (session 1)	3.17 (1.17) 2-5	4.17 (0.41) 4-5	4 (0) 4-4	4.83 (0.41) 4-5	4 (0) 4-4	3.5 (0.55) 3-4	0 (0) 0-0	0.33 (0.52) 0-1	1 (1.55) 0-3	Language Expansions, Self-Talk, Parallel talk, Reduced Length of Utterance, Notice and respond, Follow the child's lead, Mirroring and Mapping, Model target language, Recasting	Prompting	0	7	4	3
16* (session 2)	4	4	4	5	4	3	0	0	0	Language Expansions, Notice and respond, Follow the child's lead, Mirroring and Mapping, Recasting	Prompting	Sign language	3	0	4
17	3.57 (0.98) 2-5	3.15 (0.7) 2-4	4 (0) 4-4	3 (0) 3-3	2.71 (0.49) 2-3	3.57 (0.53) 3-4	0 (0) 0-0	0.43 (0.53) 0-1	1.57 (1.99) 0-4		Prompting	Sign language	0	0	2
18	3.5 (0.53) 3-4	3.9 (0.32) 3-4	4 (0) 4-4	3 (0) 3-3	4.9 (0.32) 4-5	3.9 (0.32) 3-4	0.6 (1.26) 0-4	1.2 (1.48) 0-4	2.3 (2.45) 0-5	Language Expansions, Self-Talk, Parallel talk, Reduced Length of Utterance, Follow the child's lead, Observe-Wait-Listen, Model target language, Verbal imitation	Communication Temptations, Prompting	Sign language	1	1	1
19^	2.79 (1.09) 1-4	4 (0) 4-4	4 (0) 4-4	3.56 (0.53) 3-4	4 (0) 4-4	3.33 (0.5) 3-4	0.22 (0.67) 0-2	2.67 (1.22) 1-5	3.44 (0.73) 2-4	n/a	n/a	n/a	0	0	1
20	3.17 (0.41) 3-4	3.84 (0.41) 3-4	4 (0) 4-4	4 (0) 4-4	4 (0) 4-4	4 (0) 4-4	0.5 (0.55) 0-1	1 (0.63) 0-2	3.33 (1.63) 0-4	Parallel talk, Reduced Length of Utterance, Notice and respond, Follow the child's lead, Observe-Wait-Listen, Model target language, Verbal imitation	Prompting	Sign language, Visual supports	1	1	4
21	2.67 (0.5) 2-3	3.67 (0.5) 3-4	4 (0) 4-4	4 (0) 4-4	3.89 (0.33) 3-4	4 (0) 4-4	0 (0) 0-0	0 (0) 0-0	0 (0) 0-0	Language Expansions, Self-Talk, Parallel talk, Reduced Length of Utterance, Notice and respond, Model target language, Verbal imitation, Matched turns	Communication Temptations, Prompting	0	0	0	0
22	4.7 (0.48) 4-5	4 (0) 4-4	4.3 (0.49) 4-5	4 (0) 4-4	4 (0) 4-4	3.6 (0.52) 3-4	0 (0) 0-0	0.9 (1.53) 0-4	0.4 (0.70) 0-2	Language Expansions, Self-Talk, Reduced Length of Utterance, Notice and respond, Follow the child's lead, Mirroring and Mapping, Observe-Wait-Listen, Verbal imitation	Prompting	Auditory Bombardment, Speech generating device	1	0	2
Summary of SLPs' observed fidelity in implementing NDBI strategies on the NDBI-Fi (Frost et al., 2020; Sone et al., 2021), their self-reported strategy use, and observed strategy recommendations, by type of strategy (i.e., developmental NDBI strategy, behavioral NDBI strategy, non-NDBI strategy). *SLP worked with two families in the sample; information is displayed separately for each of their re…
